# Supplementary material for: Guadecitabine plus ipilimumab in unresectable melanoma: five-year follow-up and correlation with integrated, multiomic analysis in the NIBIT-M4 trial
Source: bioRxiv or medRxiv preprint supplement (doi:10.1101/2023.02.09.23285227), 2023-02-10

**A**

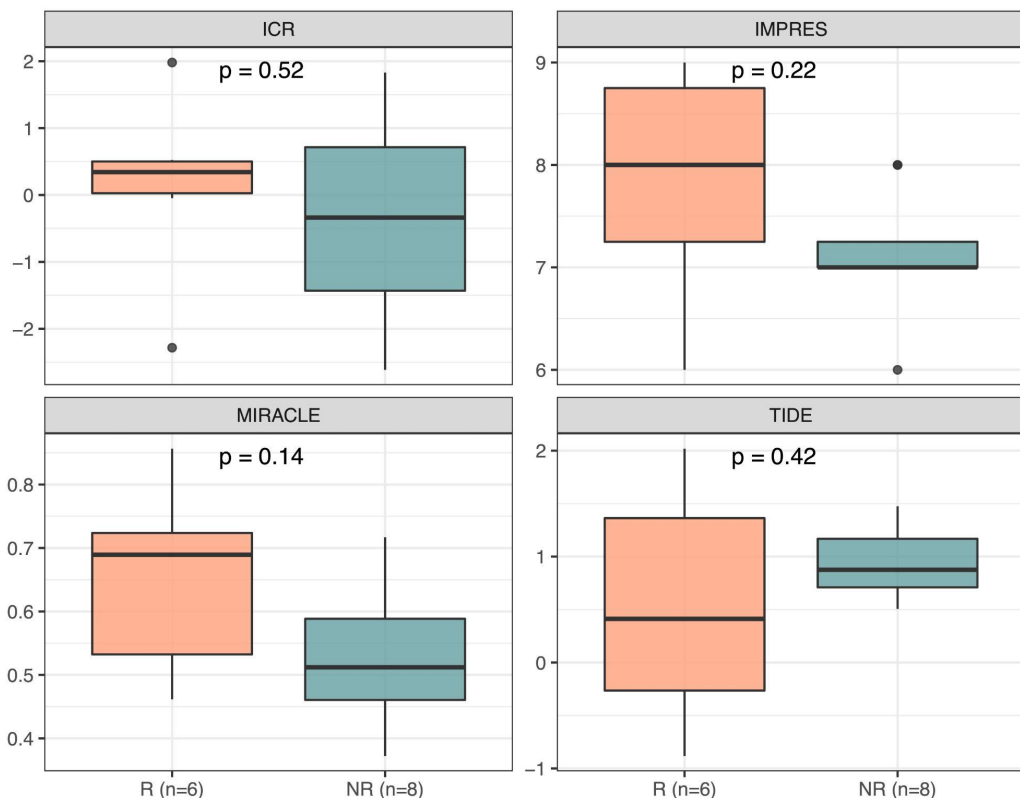

**B**

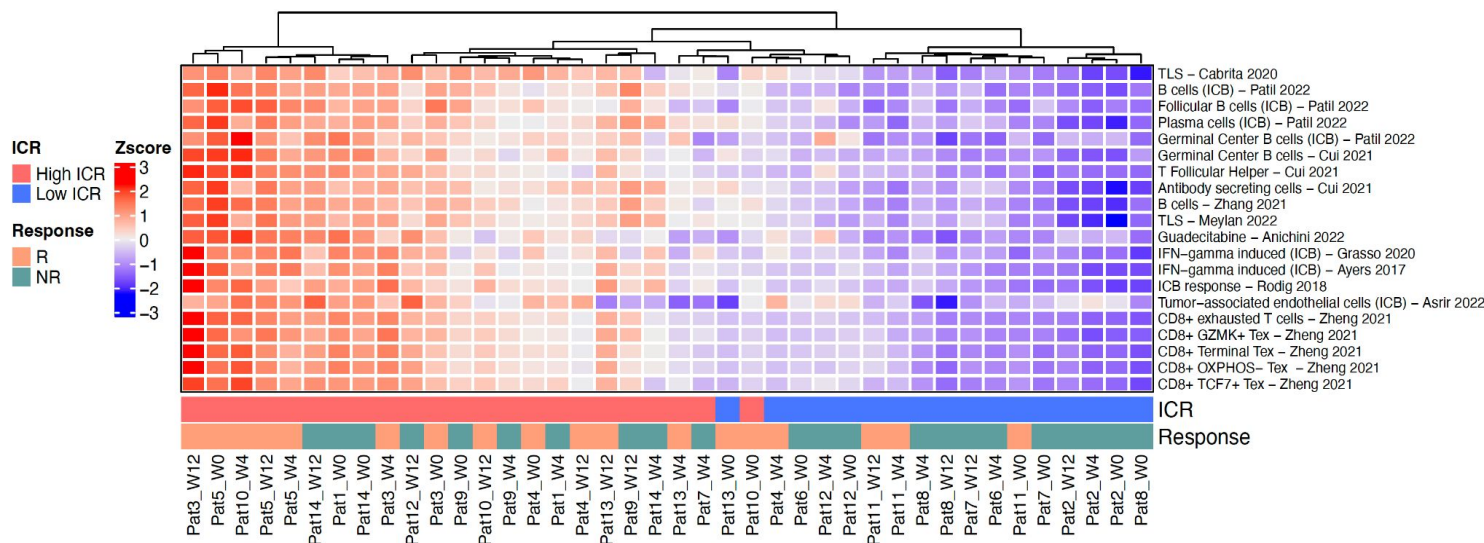

**C**

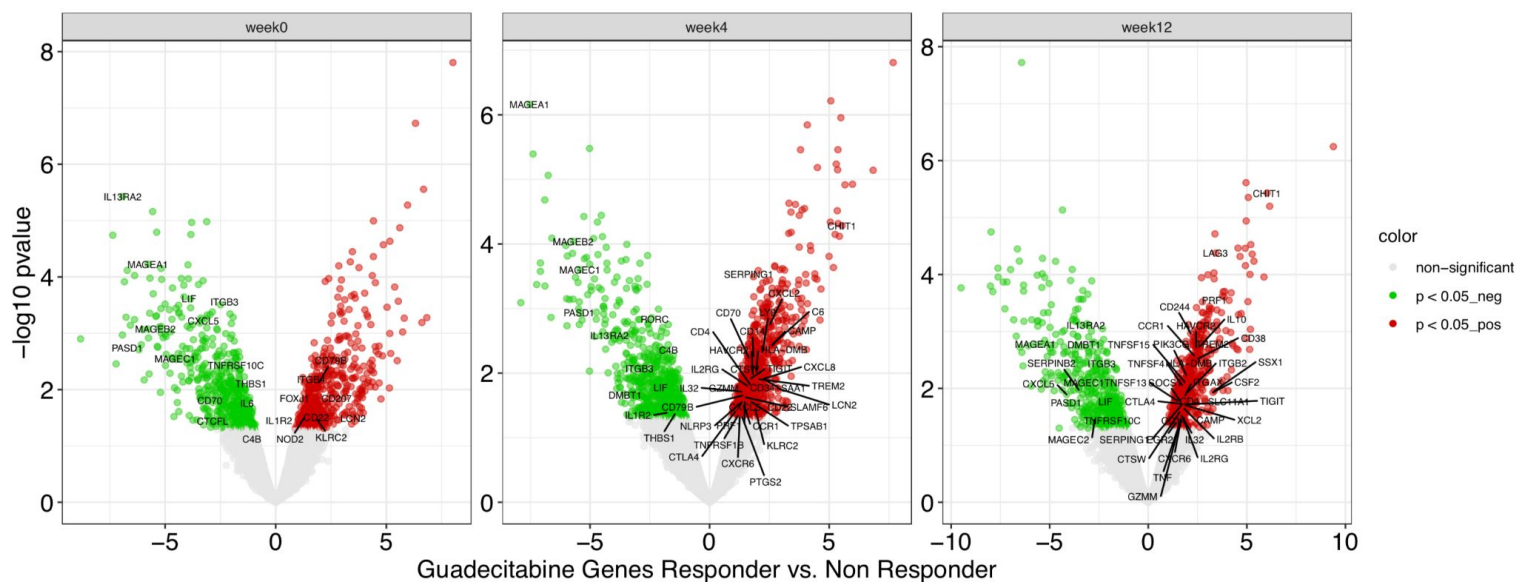

**A**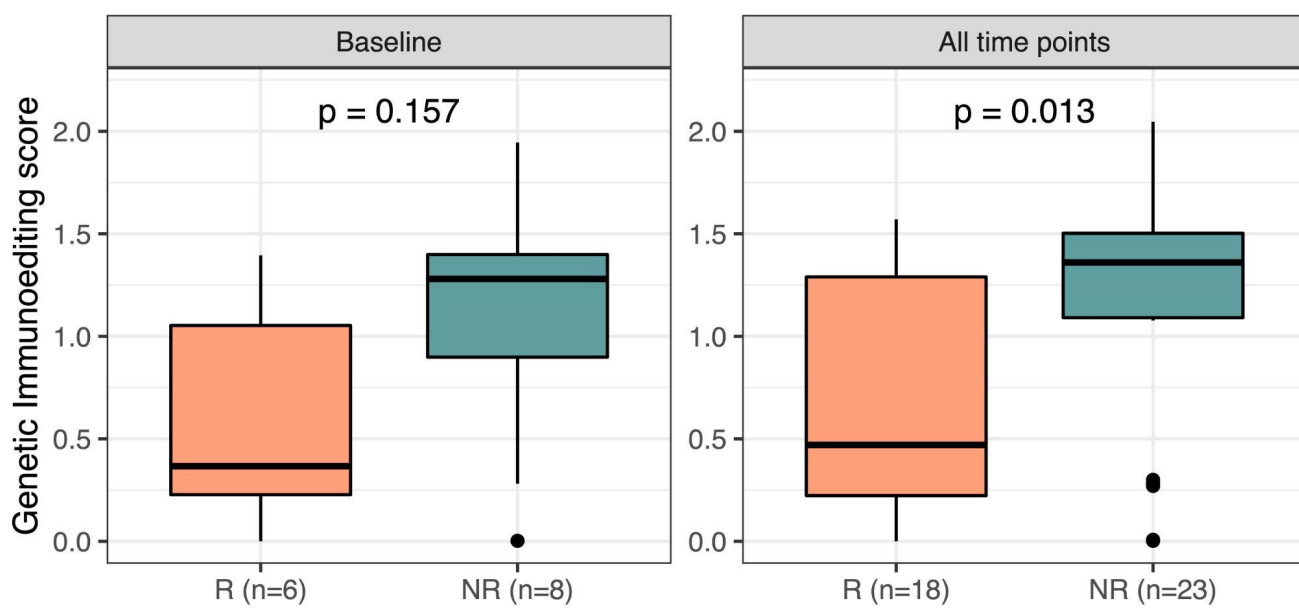**B**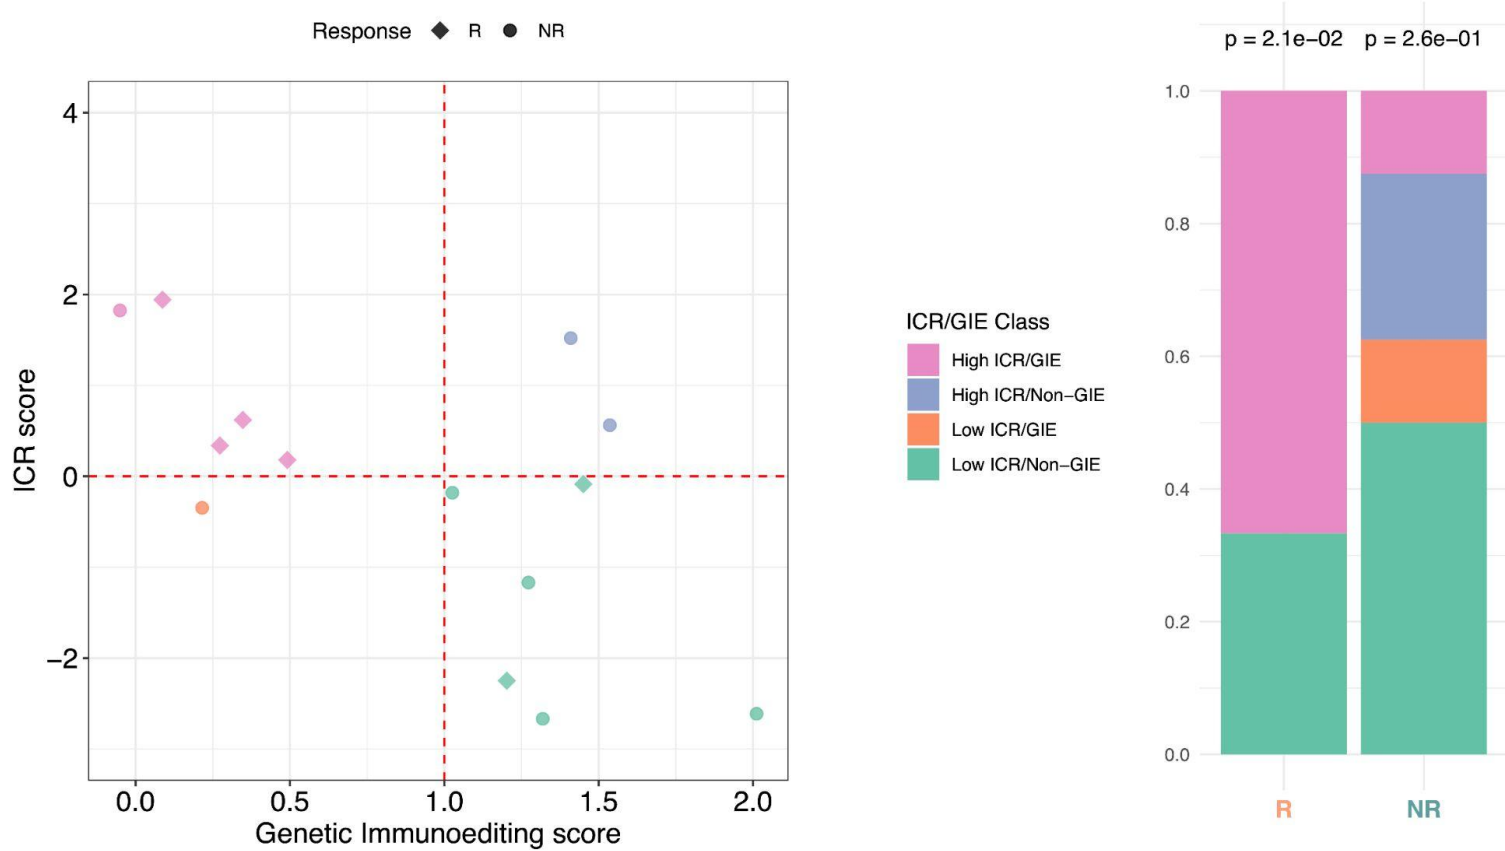

**A**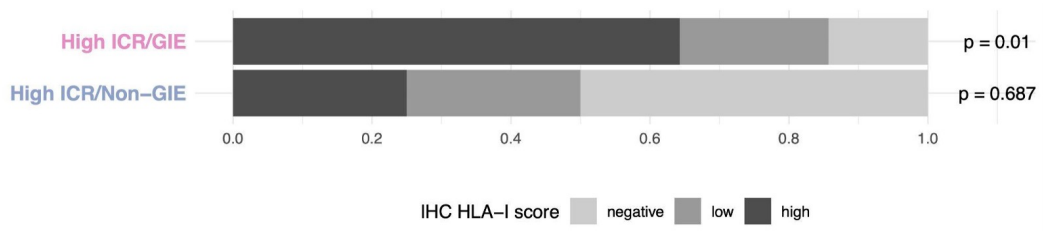**B**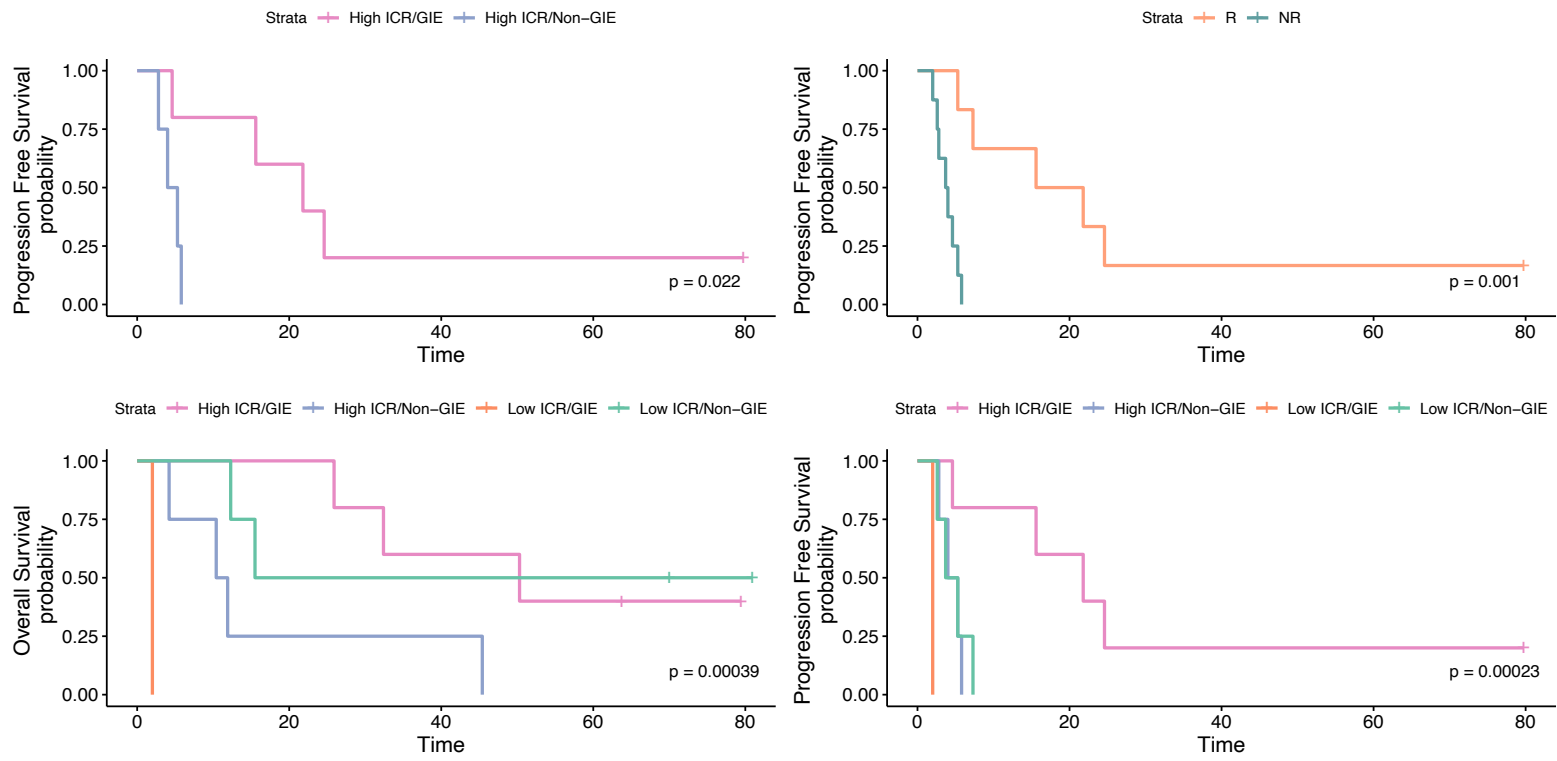

**A**

| Patient_ID | Timing of biopsy | Clinical response | ICR      | GIE     | CD8 <sup>+</sup> density, tumor core (cells/mm <sup>2</sup> ) | Tumor HLA Class I Grade (0-3) | Agreement of clinical response with ICR/GIE/CD8/HLA profile | Possible interpretation                                                                                                                                                                 |
|------------|------------------|-------------------|----------|---------|---------------------------------------------------------------|-------------------------------|-------------------------------------------------------------|-----------------------------------------------------------------------------------------------------------------------------------------------------------------------------------------|
| 3          | Week 0           | R                 | HIGH ICR | GIE     | 1460                                                          | 3                             | YES                                                         | Response associated with High ICR/GIE classification, high level of CD8 <sup>+</sup> infiltrate and retained tumor HLA class I expression                                               |
| 3          | Week 4           | R                 | HIGH ICR | GIE     | 639                                                           | 3                             |                                                             |                                                                                                                                                                                         |
| 3          | Week 12          | R                 | HIGH ICR | GIE     | 1257                                                          | 3                             |                                                             |                                                                                                                                                                                         |
| 4          | Week 0           | R                 | HIGH ICR | GIE     | 487                                                           | 3                             | YES                                                         | Response associated with High ICR/GIE classification, high level of CD8 <sup>+</sup> infiltrate and retained tumor HLA class I expression                                               |
| 4          | Week 4           | R                 | LOW ICR  | NON-GIE | 106                                                           | 3                             |                                                             |                                                                                                                                                                                         |
| 4          | Week 12          | R                 | HIGH ICR | GIE     | 912                                                           | 3                             |                                                             |                                                                                                                                                                                         |
| 5          | Week 0           | R                 | HIGH ICR | GIE     | 1476                                                          | 0                             | YES                                                         | Response associated with High ICR/GIE classification, high level of CD8 <sup>+</sup> infiltrate, in spite of defective HLA class I expression                                           |
| 5          | Week 4           | R                 | HIGH ICR | GIE     | 1139                                                          | 2                             |                                                             |                                                                                                                                                                                         |
| 5          | Week 12          | R                 | HIGH ICR | GIE     | 1015                                                          | 1                             |                                                             |                                                                                                                                                                                         |
| 10         | Week 0           | R                 | HIGH ICR | GIE     | 263                                                           | 3                             | YES                                                         | Response associated with High ICR/GIE classification, high level of CD8 <sup>+</sup> infiltrate and retained tumor HLA class I expression                                               |
| 10         | Week 4           | R                 | HIGH ICR | GIE     | 1087                                                          | 3                             |                                                             |                                                                                                                                                                                         |
| 10         | Week 12          | R                 | HIGH ICR | GIE     | 493                                                           | 2                             |                                                             |                                                                                                                                                                                         |
| 11         | Week 0           | R                 | LOW ICR  | NON-GIE | 29                                                            | 1                             | NO                                                          | Response not associated with the observed ICR/GIE/CD8/HLA profile, but explained by clinical behaviour of tumor biopsies and target lesions in a patient with SD response (see panel B) |
| 11         | Week 4           | R                 | LOW ICR  | NON-GIE | 82                                                            | 2                             |                                                             |                                                                                                                                                                                         |
| 11         | Week 12          | R                 | LOW ICR  | NON-GIE | 680                                                           | NA                            |                                                             |                                                                                                                                                                                         |
| 1          | Week 0           | NR                | HIGH ICR | GIE     | 564                                                           | 1                             | YES                                                         | Lack of response associated with low level of CD8 <sup>+</sup> infiltrate and defective tumor HLA class I expression in spite of High ICR/GIE classification                            |
| 1          | Week 4           | NR                | HIGH ICR | GIE     | 153                                                           | 0                             |                                                             |                                                                                                                                                                                         |
| 1          | Week 12          | NR                | HIGH ICR | GIE     | 171                                                           | 2                             |                                                             |                                                                                                                                                                                         |
| 2          | Week 0           | NR                | LOW ICR  | NON-GIE | 65                                                            | 0                             | YES                                                         | Lack of response associated with Low ICR/Non GIE classification, low level of CD8 <sup>+</sup> infiltrate and defective tumor HLA class I expression                                    |
| 2          | Week 4           | NR                | LOW ICR  | NON-GIE | 142                                                           | 1                             |                                                             |                                                                                                                                                                                         |
| 2          | Week 12          | NR                | LOW ICR  | NON-GIE | 194                                                           | 0                             |                                                             |                                                                                                                                                                                         |
| 6          | Week 0           | NR                | LOW ICR  | GIE     | 52                                                            | 1                             | YES                                                         | Lack of response associated with Low ICR/GIE classification, low level of CD8 <sup>+</sup> infiltrate and defective tumor HLA class I expression                                        |
| 6          | Week 4           | NR                | LOW ICR  | GIE     | 86                                                            | 2                             |                                                             |                                                                                                                                                                                         |
| 7          | Week 0           | NR                | LOW ICR  | NON-GIE | 9                                                             | 3                             | YES                                                         | Lack of response associated with Low ICR/ Non-GIE classification, low level of CD8 <sup>+</sup> infiltrate, in spite of retained tumor HLA class I expression                           |
| 7          | Week 4           | NR                | HIGH ICR | NON-GIE | NA                                                            | 3                             |                                                             |                                                                                                                                                                                         |
| 7          | Week 12          | NR                | LOW ICR  | NON-GIE | 107                                                           | 3                             |                                                             |                                                                                                                                                                                         |
| 8          | Week 0           | NR                | LOW ICR  | NON-GIE | 15                                                            | 1                             | YES                                                         | Lack of response associated with Low ICR/ Non-GIE classification, low level of CD8 <sup>+</sup> infiltrate, in spite of retained tumor HLA class I expression                           |
| 8          | Week 4           | NR                | LOW ICR  | NON-GIE | 107                                                           | 3                             |                                                             |                                                                                                                                                                                         |
| 8          | Week 12          | NR                | LOW ICR  | NON-GIE | 201                                                           | 3                             |                                                             |                                                                                                                                                                                         |
| 9          | Week 0           | NR                | HIGH ICR | NON-GIE | 550                                                           | 1                             | YES                                                         | Lack of response associated with High ICR/ Non-GIE classification, and loss of HLA class I on tumor, in spite of high level of CD8 <sup>+</sup> infiltrate                              |
| 9          | Week 4           | NR                | HIGH ICR | NON-GIE | 252                                                           | 0                             |                                                             |                                                                                                                                                                                         |
| 9          | Week 12          | NR                | HIGH ICR | NON-GIE | 922                                                           | 0                             |                                                             |                                                                                                                                                                                         |

**B**

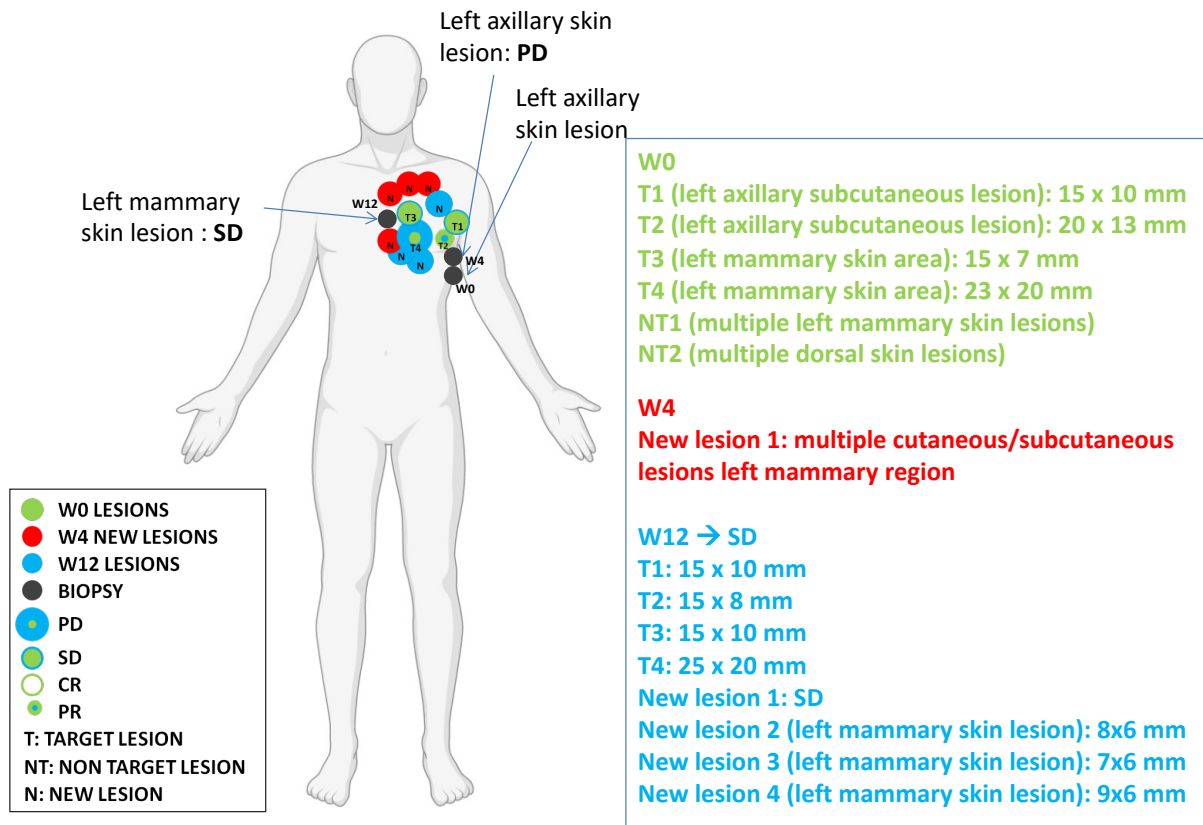

Supplement: Supplementary file [file media-1.pdf]
